# Supplementary material
Source: PubMed Central journal article supplement (PMC1482655)
Supplement: pnas_0603313103_2.pdf [file pnas_0603313103_2.pdf]

**A****A3A**

To

From

|   | A   | C   | G   | T   |
|---|-----|-----|-----|-----|
| A | --- | 7   | 3   | 0   |
| C | 0   | --- | 0   | 14  |
| G | 1   | 0   | --- | 0   |
| T | 0   | 0   | 0   | --- |

N= 10,728 bases

**A3B**

To

From

|   | A   | C   | G   | T   |
|---|-----|-----|-----|-----|
| A | --- | 13  | 1   | 0   |
| C | 1   | --- | 0   | 25  |
| G | 1   | 0   | --- | 0   |
| T | 0   | 2   | 0   | --- |

N= 10,728 bases

**A3C**

To

From

|   | A   | C   | G   | T   |
|---|-----|-----|-----|-----|
| A | --- | 6   | 3   | 0   |
| C | 0   | --- | 0   | 15  |
| G | 0   | 0   | --- | 0   |
| T | 0   | 7   | 0   | --- |

N= 10,728 bases

**A3G**

To

From

|   | A   | C   | G   | T   |
|---|-----|-----|-----|-----|
| A | --- | 2   | 5   | 1   |
| C | 1   | --- | 0   | 4   |
| G | 0   | 0   | --- | 0   |
| T | 0   | 3   | 0   | --- |

N= 10,728 bases

**B-Arr**

To

From

|   | A   | C   | G   | T   |
|---|-----|-----|-----|-----|
| A | --- | 0   | 3   | 0   |
| C | 0   | --- | 0   | 0   |
| G | 1   | 0   | --- | 0   |
| T | 0   | 2   | 0   | --- |

N= 10,728 bases

**No APOBEC3**

To

From

|   | A   | C   | G   | T   |
|---|-----|-----|-----|-----|
| A | --- | 0   | 6   | 0   |
| C | 0   | --- | 0   | 0   |
| G | 1   | 0   | --- | 0   |
| T | 0   | 0   | 0   | --- |

N= 10,728 bases
