# Supplementary material
Source: PubMed Central journal article supplement (PMC1482655)
Supplement: pnas_0603313103_6.pdf [file pnas_0603313103_6.pdf]

**A****A3A**

|      |     | To  |     |     |   |
|------|-----|-----|-----|-----|---|
| From |     | A   | C   | G   | T |
| A    | --- | 8   | 4   | 0   |   |
| C    | 0   | --- | 0   | 17  |   |
| G    | 0   | 0   | --- | 0   |   |
| T    | 0   | 0   | 0   | --- |   |

N= 5,364 bases

**A3B**

|      |     | To  |     |     |   |
|------|-----|-----|-----|-----|---|
| From |     | A   | C   | G   | T |
| A    | --- | 8   | 1   | 0   |   |
| C    | 0   | --- | 0   | 16  |   |
| G    | 1   | 0   | --- | 0   |   |
| T    | 0   | 1   | 0   | --- |   |

N= 5,364 bases

**A3C**

|      |     | To  |     |     |   |
|------|-----|-----|-----|-----|---|
| From |     | A   | C   | G   | T |
| A    | --- | 8   | 2   | 0   |   |
| C    | 0   | --- | 0   | 17  |   |
| G    | 1   | 0   | --- | 0   |   |
| T    | 0   | 1   | 0   | --- |   |

N= 5,364 bases

**A3Am**

|      |     | To  |     |     |   |
|------|-----|-----|-----|-----|---|
| From |     | A   | C   | G   | T |
| A    | --- | 12  | 3   | 0   |   |
| C    | 0   | --- | 0   | 24  |   |
| G    | 0   | 0   | --- | 0   |   |
| T    | 0   | 3   | 0   | --- |   |

N= 5,811 bases

**B-Arr**

|      |     | To  |     |     |   |
|------|-----|-----|-----|-----|---|
| From |     | A   | C   | G   | T |
| A    | --- | 11  | 1   | 0   |   |
| C    | 0   | --- | 0   | 22  |   |
| G    | 1   | 0   | --- | 0   |   |
| T    | 0   | 1   | 0   | --- |   |

N= 5,811 bases

**No APOBEC3**

|      |     | To  |     |     |   |
|------|-----|-----|-----|-----|---|
| From |     | A   | C   | G   | T |
| A    | --- | 4   | 0   | 1   |   |
| C    | 0   | --- | 0   | 9   |   |
| G    | 2   | 0   | --- | 0   |   |
| T    | 0   | 0   | 0   | --- |   |

N= 5,811 bases
