# Supplementary material
Source: PubMed Central journal article supplement (PMC1482655)
Supplement: pnas_0603313103_8.pdf [file pnas_0603313103_8.pdf]

**B****A3A**

|      |   | To  |     |     |     |
|------|---|-----|-----|-----|-----|
|      |   | A   | C   | G   | T   |
| From |   | --- | 0   | 3   | 0   |
|      | A | --- | 0   | 3   | 0   |
|      | C | 0   | --- | 0   | 0   |
|      | G | 1   | 0   | --- | 0   |
|      | T | 0   | 0   | 0   | --- |

N= 10,728 bases

**A3B**

|      |   | To  |     |     |     |
|------|---|-----|-----|-----|-----|
|      |   | A   | C   | G   | T   |
| From |   | --- | 1   | 1   | 0   |
|      | A | --- | 1   | 1   | 0   |
|      | C | 1   | --- | 0   | 1   |
|      | G | 1   | 0   | --- | 0   |
|      | T | 0   | 2   | 0   | --- |

N= 10,728 bases

**A3C**

|      |   | To  |     |     |     |
|------|---|-----|-----|-----|-----|
|      |   | A   | C   | G   | T   |
| From |   | --- | 0   | 3   | 0   |
|      | A | --- | 0   | 3   | 0   |
|      | C | 0   | --- | 0   | 3   |
|      | G | 0   | 0   | --- | 0   |
|      | T | 0   | 7   | 0   | --- |

N= 10,728 bases

**A3G**

|      |   | To  |     |     |     |
|------|---|-----|-----|-----|-----|
|      |   | A   | C   | G   | T   |
| From |   | --- | 0   | 5   | 1   |
|      | A | --- | 0   | 5   | 1   |
|      | C | 1   | --- | 0   | 0   |
|      | G | 0   | 0   | --- | 0   |
|      | T | 0   | 3   | 0   | --- |

N= 10,728 bases

**B-Arr**

|      |   | To  |     |     |     |
|------|---|-----|-----|-----|-----|
|      |   | A   | C   | G   | T   |
| From |   | --- | 0   | 3   | 0   |
|      | A | --- | 0   | 3   | 0   |
|      | C | 0   | --- | 0   | 0   |
|      | G | 1   | 0   | --- | 0   |
|      | T | 0   | 2   | 0   | --- |

N= 10,728 bases

**No APOBEC3**

|      |   | To  |     |     |     |
|------|---|-----|-----|-----|-----|
|      |   | A   | C   | G   | T   |
| From |   | --- | 0   | 6   | 0   |
|      | A | --- | 0   | 6   | 0   |
|      | C | 0   | --- | 0   | 0   |
|      | G | 1   | 0   | --- | 0   |
|      | T | 0   | 0   | 0   | --- |

N= 10,728 bases
