# Supplementary material
Source: PubMed Central journal article supplement (PMC1482655)

48

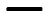

26

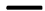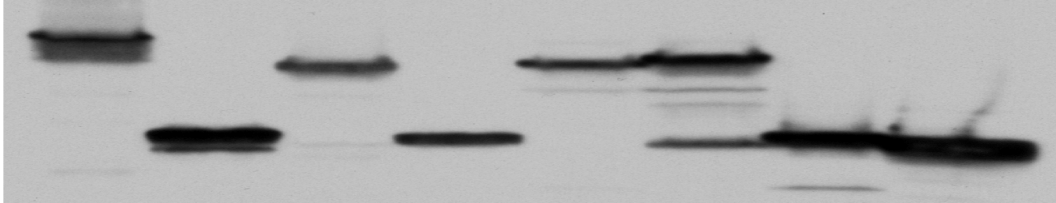**Control****A3A****A3B****A3C****A3F****A3G****N-A3B****C-A3B**

Supplement: pnas_0603313103_1.pdf [file pnas_0603313103_1.pdf]

**A**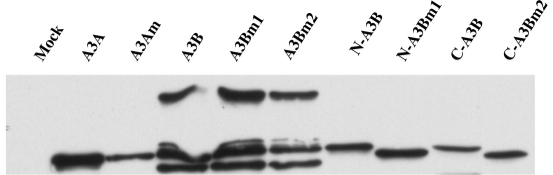**B**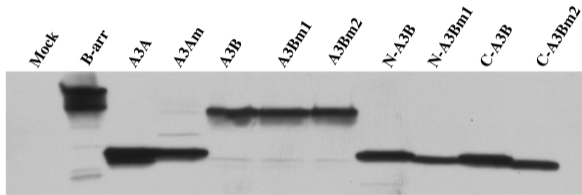**C**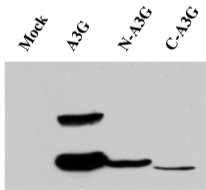**D**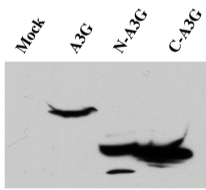

Supplement: pnas_0603313103_3.pdf [file pnas_0603313103_3.pdf]

**A**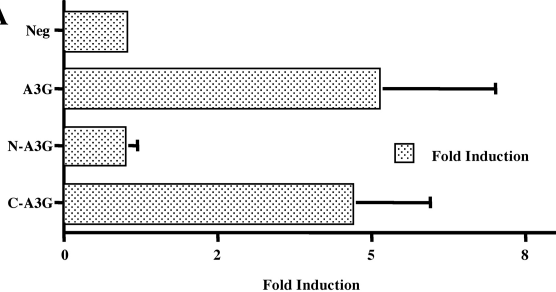**B**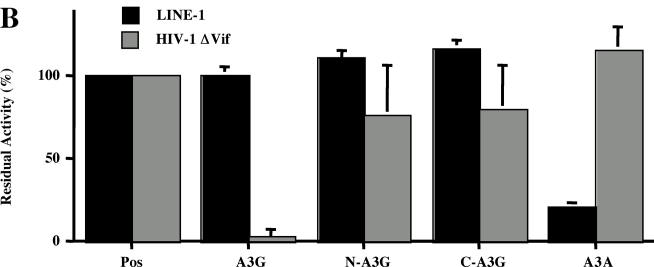

Supplement: pnas_0603313103_4.pdf [file pnas_0603313103_4.pdf]

## A LINE-1

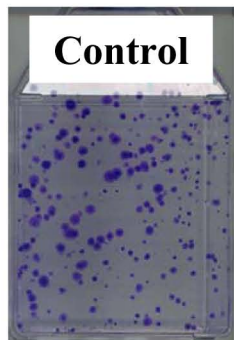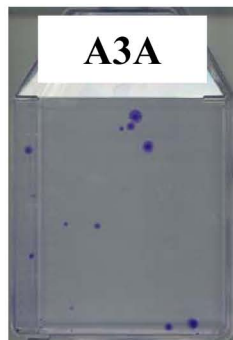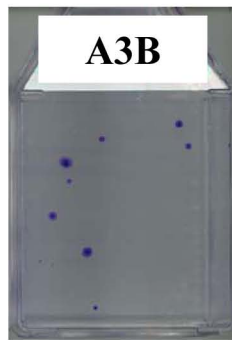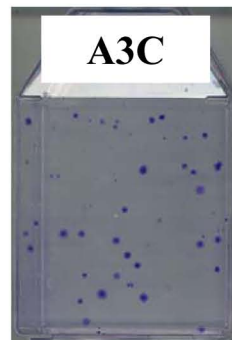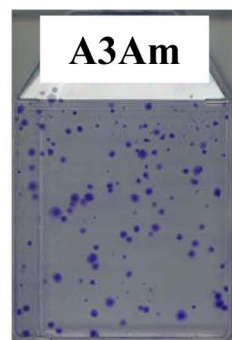

## B ORF2 only

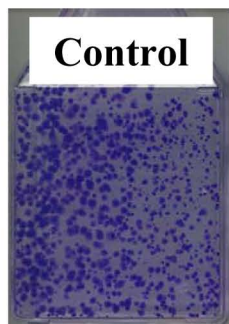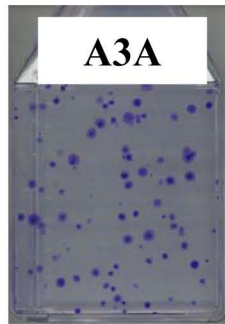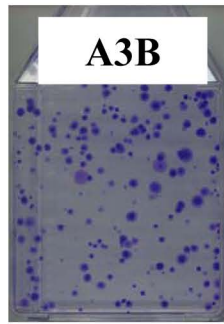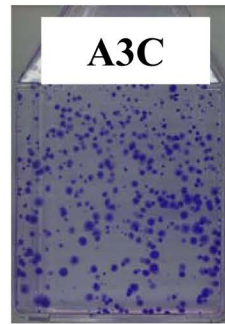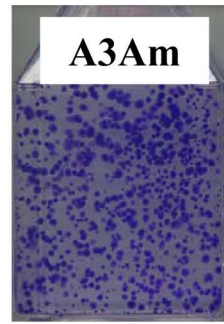

Supplement: pnas_0603313103_5.pdf [file pnas_0603313103_5.pdf]

C- MW Spleen Thymus Prostate Testis Ovary Small intestine Colon PBLs

**β-Actin**

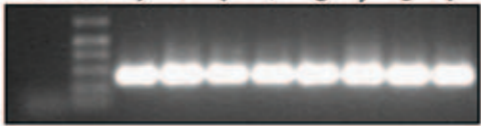

**LINE-1**

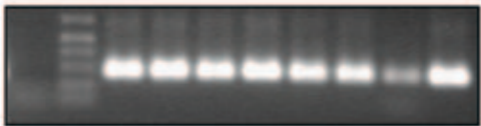

**A3A**

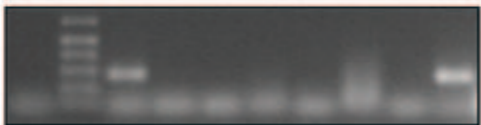

**A3B**

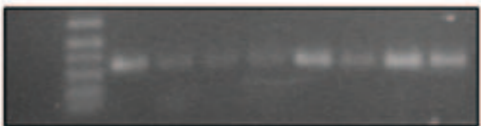

Supplement: pnas_0603313103_7.pdf [file pnas_0603313103_7.pdf]
